# Supplementary material
Source: PubMed Central journal article supplement (PMC2771394)
Supplement: NIHMS150487-supplement-Supplementary_data.pdf [file NIHMS150487-supplement-Supplementary_data.pdf]

Table S1 – Phenotypes not differing between WT and  $\Delta cprS$

|                                 | <b>Phenotype</b>                                  | <b>Experiment</b>                                          |
|---------------------------------|---------------------------------------------------|------------------------------------------------------------|
| <b>Pathogenesis-related:</b>    | Adherence and invasion                            | <i>in vitro</i> INT 407 gentamicin protection assay        |
|                                 | Serum sensitivity                                 | 10% human serum survival                                   |
| <b>Antimicrobial tolerance:</b> | Antibiotic resistance:                            | MICs: gentamicin, ampicillin, rifampicin                   |
|                                 | Antimicrobial tolerance:                          | MICs: Tween-20, Triton X-100, ethidium bromide, EDTA       |
|                                 | Low pH survival                                   | acetic acid disk diffusion assay, MH broth pH 5.5 survival |
| <b>Atmospheric tolerance:</b>   | Aerobic atmosphere survival                       | ambient atmosphere broth culture survival                  |
|                                 | Anaerobic atmosphere survival                     | anaerobic atmosphere broth culture survival                |
|                                 | Oxidative sensitivity                             | 30% H <sub>2</sub> O <sub>2</sub> disk diffusion assay     |
|                                 | Low CO <sub>2</sub> tolerance                     | 5% CO <sub>2</sub> atmosphere growth                       |
| <b>Carbohydrates:</b>           | Surface polysaccharides                           | Calcofluor white, Congo red, and Sudan black reactivity    |
|                                 | Lipooligosaccharide                               | SDS-PAGE - silver stain profile                            |
|                                 | Capsule                                           | SDS-PAGE - Alcian blue staining and Penner immunoblotting  |
| <b>Nutritional stress:</b>      | Low iron (Fe <sup>2+</sup> and Fe <sup>3+</sup> ) | dipyridyl and desferal sensitivity                         |
|                                 | Nutritional downshift                             | survival in Minimal Essential media                        |
| <b>Other:</b>                   | Heat shock                                        | growth at 45°C                                             |
|                                 | Low osmotic tolerance                             | survival in water                                          |

Table S2. Strains used in this study.

|                                 |                                                                  |                              |
|---------------------------------|------------------------------------------------------------------|------------------------------|
| <b><i>C. jejuni</i> strains</b> |                                                                  |                              |
| 81-176                          | wildtype                                                         | Korlath <i>et al.</i> , 1985 |
| $\Delta cprS$                   | 81-176 <i>cprS</i> ::Cm <sup>R</sup> derivative                  | this study                   |
| $\Delta cprS$ ::KmR             | 81-176 <i>cprS</i> ::Kan <sup>R</sup> derivative                 | this study                   |
| $\Delta cprS^C$                 | 81-176 <i>cprS</i> ::Cm <sup>R</sup> <i>rm</i> :: <i>cprS</i>    | this study                   |
| $\Delta spoT$                   | 81-176 <i>spoT</i> ::Kan <sup>R</sup>                            | Gaynor <i>et al.</i> 2005    |
| <b><i>E. coli</i> strains</b>   |                                                                  |                              |
| DH5a                            | general cloning strain, <i>recA1 endA1</i>                       | Invitrogen                   |
| Bacteriomatch II                | two-hybrid <i>HIS3</i> and <i>aadA</i> reporter strain           | Stratagene                   |
| <b>Plasmids</b>                 |                                                                  |                              |
| pCR-XL-TOPO                     | PCR cloning vector, Km <sup>R</sup>                              | Invitrogen                   |
| pGEM-T                          | PCR cloning vector, Amp <sup>R</sup>                             | Promega                      |
| pJM1                            | <i>cprS</i> ::CmR in pCR-XL-TOPO                                 | this study                   |
| pJM2                            | <i>cprR</i> ::CmR in pCR-XL-TOPO                                 | this study                   |
| pSS3                            | <i>cprS</i> ::KmR in pGEM-T                                      | this study                   |
| pRRK                            | <i>C. jejuni</i> rRNA spacer integration vector, Km <sup>R</sup> | J. Ketley                    |
| pSS50                           | <i>cprS</i> in pRRK, KmR                                         | this study                   |
| pBT                             | two-hybrid lambda cl fusion vector, Cm <sup>R</sup>              | Stratagene                   |
| pTRG                            | two-hybrid RNAP- $\alpha$ fusion vector, Km <sup>R</sup>         | Stratagene                   |
| pSS38                           | <i>cprS</i> C-terminal domain in pTRG                            | this study                   |
| pSS39                           | <i>dccR</i> in pBT                                               | this study                   |
| pSS41                           | <i>cprR</i> in pBT                                               | this study                   |

Table S3. Primers used in this study

| Primer name               | Sequence (5' → 3')                         | Restriction site | Source                   |
|---------------------------|--------------------------------------------|------------------|--------------------------|
| <i>cprS</i> -TOPO FWD     | GTTTCAAGCGCAAGACAT                         | -                | this study               |
| <i>cprS</i> -TOPO REV     | GAGCTTAAGGAGCGTTTGGA                       | -                | this study               |
| <i>cprS</i> -INV FWD      | TAAGCCACAAAAAGCCAAGT                       | <i>Mfe</i> I     | this study               |
| <i>cprS</i> -INV REV      | AATCAAGTTTTGGATTAGGGCTTT                   | <i>Mfe</i> I     | this study               |
| <i>cprS</i> -pGEM FWD     | GTCTGGATCCGTTTTGCGACTTTGCTTGTGC            | <i>Bam</i> HI    | this study               |
| <i>cprS</i> -pGEM REV     | GTGTCTCGAGTACTCTACCGCTGAGCTAATCCG          | <i>Xho</i> I     | this study               |
| <i>cprS</i> -INV2 FWD     | GCAGTCTAGAGAAATGATAGAAGATAATAAATATAAAGAGCG | <i>Xba</i> I     | this study               |
| <i>cprS</i> -INV2 REV     | GTAAAGGTACCGCCAAGTATAACACTAACCCAGC         | <i>Kpn</i> I     | this study               |
| <i>cprS</i> -pRRC FWD     | GCTCTAGAGTTATAAGCTTACTCAATGAATAAATC        | <i>Xba</i> I     | this study               |
| <i>cprS</i> -pRRC REV     | GCCAATTGTTACTCCTTAACAATAACACTTTTTAAATTC    | <i>Mfe</i> I     | this study               |
| ak233                     | GCAAGAGTTTTGCTTATGTTAGCAC                  | -                | Karlyshev and Wren, 2005 |
| ak234                     | GAAATGGGCAGAGTGATTCTCCG                    | -                | Karlyshev and Wren, 2005 |
| ak235                     | GTGCGGATAATGTTGTTTCTG                      | -                | Karlyshev and Wren, 2005 |
| PKanF                     | CAAGTGGTATGACATTGCCTTCTG                   | -                | J. Ketley                |
| BT- <i>cprR</i> FWD       | GATCGGATCCATGACAAATATTCTTATGATAGAAGATGATT  | <i>Bam</i> HI    | this study               |
| BT- <i>cprR</i> REV       | GTACACTAGTTCATTGAGTAAGCTTATAACCTATTCC      | <i>Spe</i> I     | this study               |
| BT- <i>dccR</i> FWD       | GATCGGATCCATGGCTGCTAAAATTTACTTTTAG         | <i>Bam</i> HI    | this study               |
| BT- <i>dccR</i> REV       | GTACACTAGTTTAGCCATAGCAATATCCCCTG           | <i>Spe</i> I     | this study               |
| TRG- <i>cprS</i> -CTD FWD | GATCGGATCCATGGGGTGGATGAAATTC               | <i>Bam</i> HI    | this study               |
| TRG- <i>cprS</i> -CTD REV | GTACCTCGAGTACTCCTTAACAATAACACTTTTTAAATTT   | <i>Xho</i> I     | this study               |
| <i>htrA</i> -3'           | GTTCAAGTGCTGATGAAGCAGG                     | -                | this study               |
